# Supplementary material for: Kinetic analysis of the growth behavior of perovskite CsPbBr3 nanocrystals in a microfluidic system
Source: Royal Society of Chemistry journal article supplement (doi:10.1039/d2lc00331g), 2022-01-01
Supplement: d2lc00331g1.pdf [file d2lc00331g1.pdf]

## Supplementary Information

Kinetic analysis of the growth behavior of perovskite CsPbBr<sub>3</sub> nanocrystals in a  
microfluidic system

Xiaobing Tang and Fuqian Yang\*

Materials Program, Department of Chemical and Materials Engineering, University of  
Kentucky, Lexington, KY 40506, USA

\*Corresponding author. E-mail: fuqian.yang@uky.edu (F. Yang)

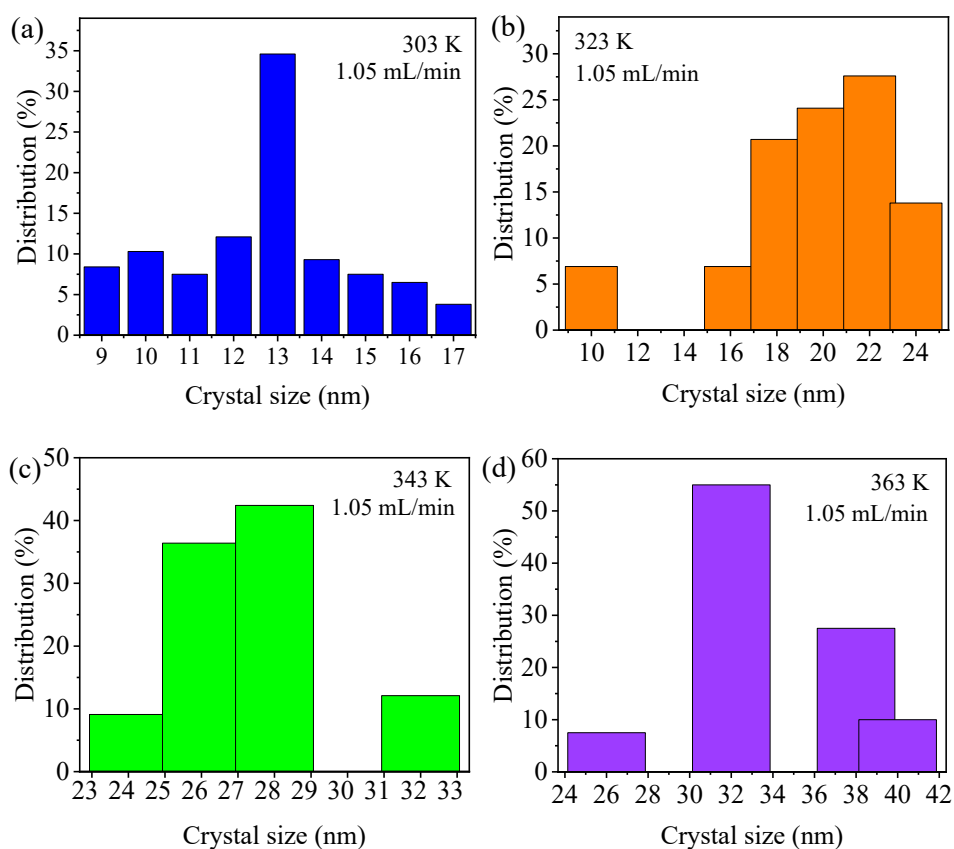

**Figure S1.** Histograms of the size distribution of the prepared CsPbBr<sub>3</sub> NCs as determined from the TEM images in Fig. 2 at different synthesis temperatures: (a) 303 K, (b) 323 K, (c) 343 K, and (d) 363 K.

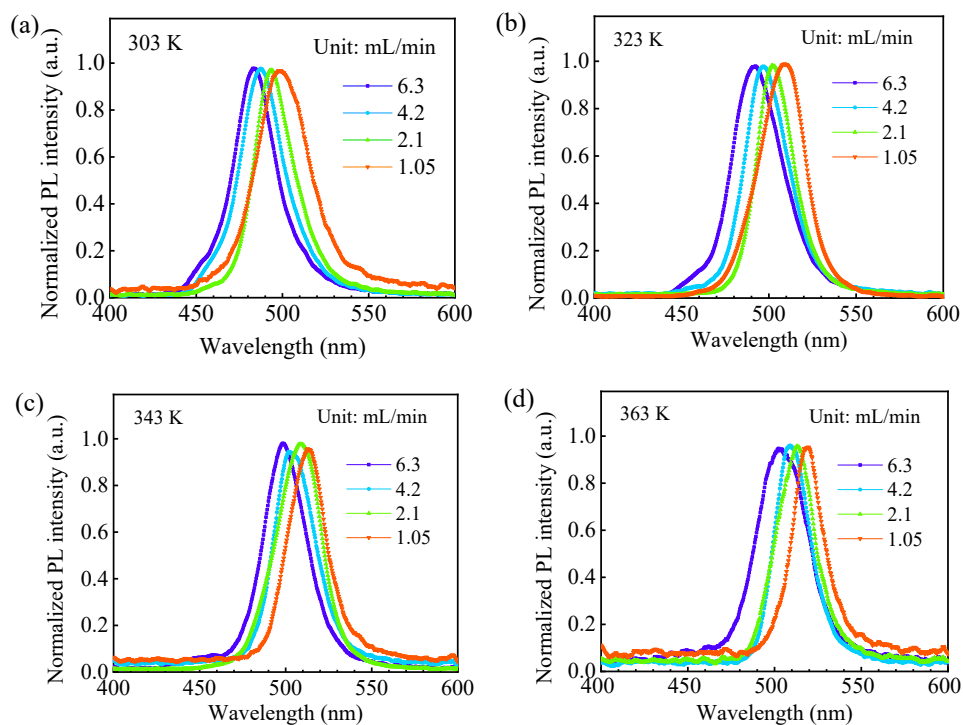

**Figure S2.** PL spectra of the CsPbBr<sub>3</sub> NCs prepared with total flow rates in a range of from 1.05 to 6.3 mL/min at different synthesis temperatures: (a) 303 K, (b) 323 K, (c) 343 K, and (d) 363 K.

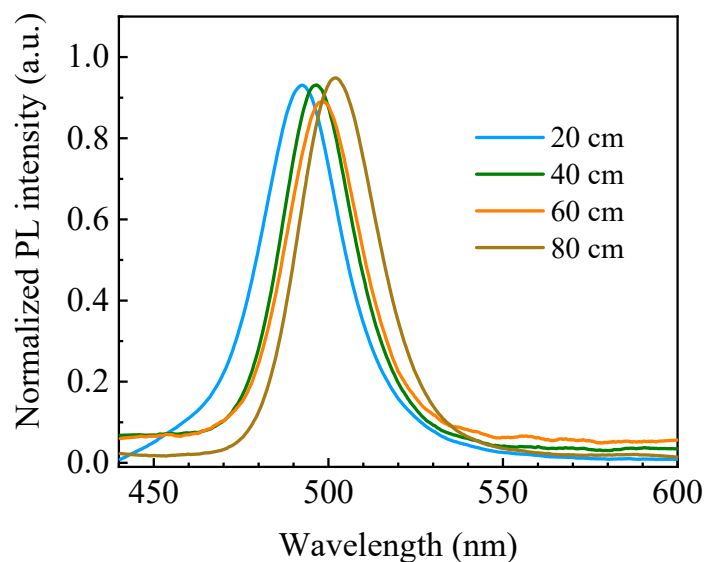

**Figure S3.** PL spectra of CsPbBr<sub>3</sub> NCs prepared at a fixed total flow rate of 1.05 mL/min with capillaries of different lengths for the growth of the CsPbBr<sub>3</sub> NCs.

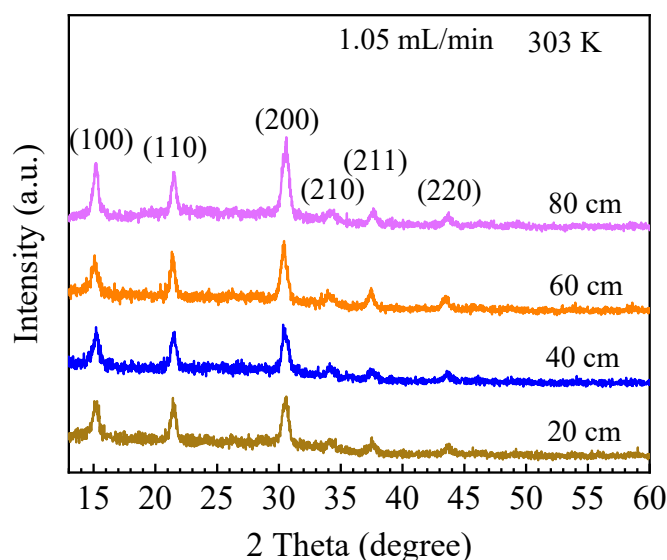

**Figure S4.** XRD patterns of CsPbBr<sub>3</sub> NCs prepared at a fixed total flow rate of 1.05 mL/min with capillaries of different lengths for the growth of the CsPbBr<sub>3</sub> NCs.

**Table S1.** Average Sizes of the prepared CsPbBr<sub>3</sub> NCs calculated from XRD spectra

| Temperature | Crystal size |            |            |             |
|-------------|--------------|------------|------------|-------------|
|             | 6.3 mL/min   | 4.2 mL/min | 2.1 mL/min | 1.05 mL/min |
| 303 K       | 6.9 nm       | 8.2 nm     | 10.6 nm    | 11.4 nm     |
| 323 K       | 9.9 nm       | 11.6 nm    | 12.1 nm    | 12.7 nm     |
| 343 K       | 10.5 nm      | 12.0 nm    | 14.2 nm    | 16.7 nm     |
| 363 K       | 11.9 nm      | 14.9 nm    | 15.7 nm    | 17.0 nm     |

### Calculation of Reynolds number (Re) of the NC solutions.

Using equation  $Re = \rho v d / \mu$  ( $\rho$ ,  $v$ ,  $\mu$  are density, flow velocity and viscosity of fluid.  $d$  is diameter of a capillary tube), we calculated the Reynolds number (Re) of the NC solutions in the capillary under four total flow rates at a temperature of 303 K, as shown in Tables S2-1 and S2-2 below.

Flow velocity:

$$1.05 \text{ mL/min} = 1.75 \times 10^{-8} \text{ m}^3/\text{s} = 3.48 \times 10^{-2} \text{ m/s (diameter of tube is 0.8 mm)}$$

$$2.1 \text{ mL/min} = 3.50 \times 10^{-8} \text{ m}^3/\text{s} = 6.96 \times 10^{-2} \text{ m/s (diameter of tube is 0.8 mm)}$$

$$4.2 \text{ mL/min} = 7.00 \times 10^{-8} \text{ m}^3/\text{s} = 1.39 \times 10^{-1} \text{ m/s (diameter of tube is 0.8 mm)}$$

$$6.3 \text{ mL/min} = 1.05 \times 10^{-7} \text{ m}^3/\text{s} = 2.09 \times 10^{-1} \text{ m/s (diameter of tube is 0.8 mm)}$$

$$\rho_{\text{DMF}} = 0.94 \text{ (g/cm}^3\text{)}^{[1]} \quad \mu_{\text{DMF}} = 0.759 \text{ mPa}\cdot\text{s}^{[1]}$$

$$\rho_{\text{toluene}} = 0.86 \text{ (g/cm}^3\text{)}^{[2]} \quad \mu_{\text{toluene}} = 0.53 \text{ mPa}\cdot\text{s}^{[2]}$$

[1] Densities and Viscosities of N,N-Dimethylformamide + N-Methyl-2-pyrrolidinone and + Dimethyl Sulfoxide in the Temperature Range (303.15 to 353.15) K, Journal

of Chemical & Engineering Data, 2008, 53(7): 1639-1642.

[2] [Viscosity of Toluene – viscosity table and viscosity chart :: Anton Paar Wiki \(anton-paar.com\)](#)

**(1) Fixed volume ratio of DMF to Toluene (Volume ratio: DMF/Toluene = 1/20)**

$$\rho = (1/21) \times \rho_{\text{DMF}} + (20/21) \times \rho_{\text{toluene}}$$

$$\mu = (1/21) \times \mu_{\text{DMF}} + (20/21) \times \mu_{\text{toluene}}$$

**Table S2-1.** Reynolds numbers of the CsPbBr<sub>3</sub> NC solution at four total flow rates

| Temperature | Reynolds number (Re) |            |            |            |
|-------------|----------------------|------------|------------|------------|
|             | 1.05 mL/min          | 2.1 mL/min | 4.2 mL/min | 6.3 mL/min |
| 303 K       | 44.4                 | 88.8       | 177.5      | 266.3      |

**(2) Various volume ratios of DMF to Toluene**

**Table S2-2.** Reynolds numbers of the CsPbBr<sub>3</sub> NC solutions at four total flow rates under three volume ratios of precursor solution and toluene

| V <sub>DMF</sub> :V <sub>toluene</sub> | Reynolds number |            |            |            |
|----------------------------------------|-----------------|------------|------------|------------|
|                                        | 1.05 mL/min     | 2.1 mL/min | 4.2 mL/min | 6.3 mL/min |
| 1:6                                    | 43.2            | 86.4       | 172.8      | 259.2      |
| 1:13                                   | 44.2            | 88.4       | 176.8      | 265.1      |
| 1:20                                   | 44.4            | 88.8       | 177.5      | 266.3      |
